# Supplementary material for: Divergence of the Yeast Transcription Factor FZF1 Affects Sulfite Resistance
Source: PLOS journal article supplement (doi:10.1371/journal.pgen.1002763), 2012-06-14

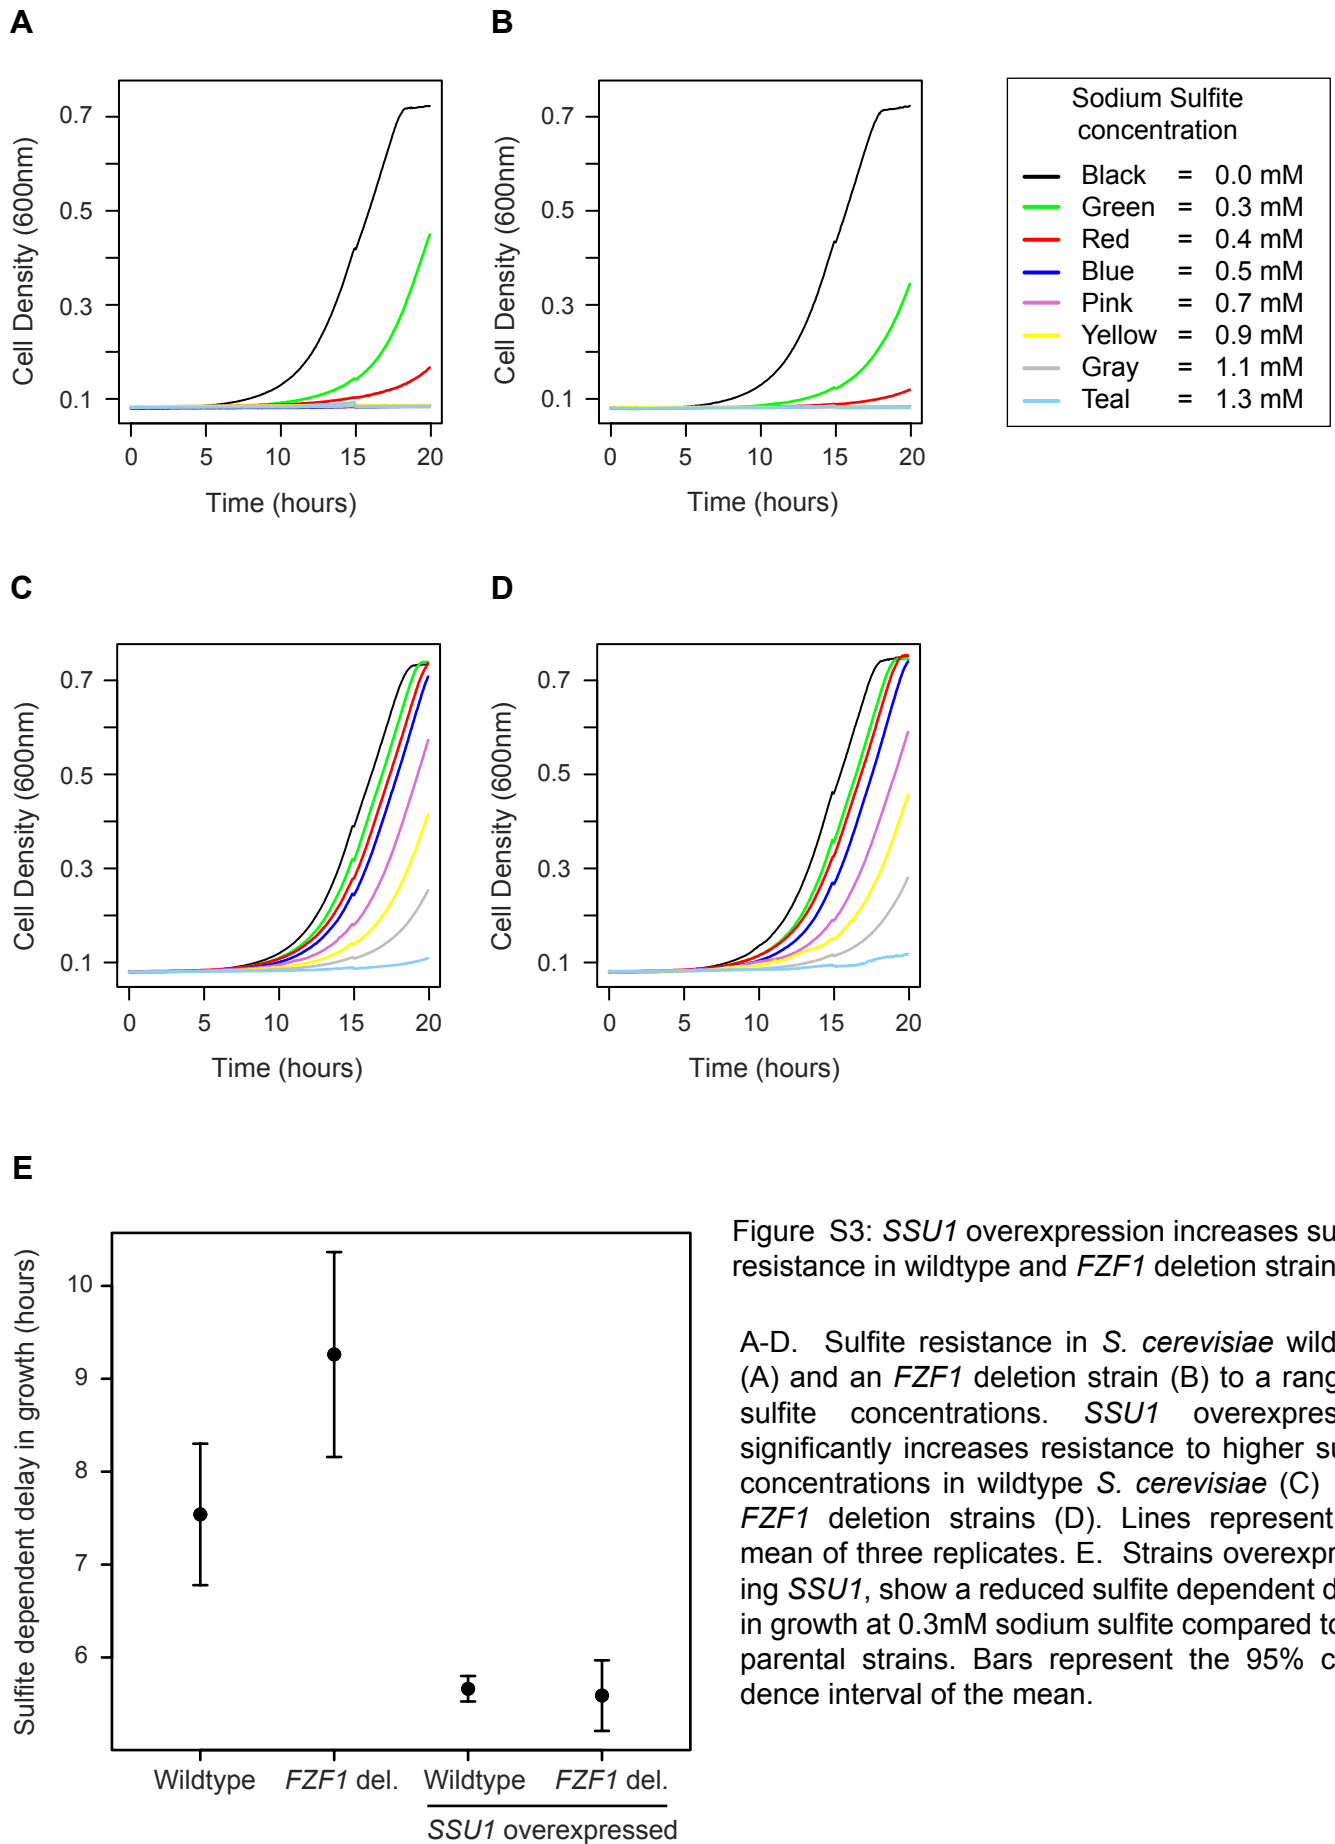

Supplement: S5 (10.1371/journal.pgen.1002763.s005) [file journal.pgen.1002763.s005]
